# Supplementary material for: Evolution of core archetypal phenotypes in progressive high grade serous ovarian cancer
Source: Research Square preprint supplement (doi:10.21203/rs.3.rs-141400/v1), 2021-01-12
Supplement: Supplementary file 1 [file dfb0c5d35d8b39cec981c34e.xlsx]

## Sheet: Supplementary Table 5 - Arc spe
Supplementary Table 5
Sample	Specialist	Proportion	Time
P04_Time1	NS	0.47	1281
P04_Time1	CDR	0.07	1281
P04_Time1	DDR	0.04	1281
P04_Time1	MAP	0.42	1281
P04_Time2	NS	0.4	1598
P04_Time2	CDR	0.41	1598
P04_Time2	DDR	0.03	1598
P04_Time2	MAP	0.16	1598
P04_Time3	NS	0.21	1983
P04_Time3	CDR	0.35	1983
P04_Time3	DDR	0.21	1983
P04_Time3	MAP	0.24	1983
P05_Time1	NS	0.42	-88
P05_Time1	CDR	0.01	-88
P05_Time1	MAP	0.52	-88
P05_Time1	DDR	0.05	-88
P05_Time2	NS	0.58	-66
P05_Time2	CDR	0.01	-66
P05_Time2	MAP	0.37	-66
P05_Time2	DDR	0.04	-66
P05_Time3	NS	0.48	304
P05_Time3	CDR	0.01	304
P05_Time3	MAP	0.46	304
P05_Time3	DDR	0.06	304
P06_Time1	NS	0.46	402
P06_Time1	CDR	0.01	402
P06_Time1	MAP	0.3	402
P06_Time1	DDR	0.23	402
P06_Time2	NS	0.25	591
P06_Time2	CDR	0.2	591
P06_Time2	MAP	0.11	591
P06_Time2	DDR	0.43	591
P06_Time3	NS	0.55	616
P06_Time3	CDR	0.02	616
P06_Time3	MAP	0.32	616
P06_Time3	DDR	0.11	616
P07_Time1	NS	0.17	0
P07_Time1	MAP	0.76	0
P07_Time1	DDR	0.01	0
P07_Time1	CDR	0.07	0
P07_Time2	NS	0.18	1361
P07_Time2	MAP	0.01	1361
P07_Time2	DDR	0	1361
P07_Time2	CDR	0.81	1361
P08_Time1	NS	0.37	13
P08_Time1	CDR	0.6	13
P08_Time1	DDR	0.01	13
P08_Time1	MAP	0.02	13
P08_Time2	NS	0.41	685
P08_Time2	CDR	0.43	685
P08_Time2	DDR	0	685
P08_Time2	MAP	0.16	685
P08_Time3	NS	0.78	890
P08_Time3	CDR	0.14	890
P08_Time3	DDR	0.03	890
P08_Time3	MAP	0.05	890
P09_Time1	NS	0.35	503
P09_Time1	CDR	0.16	503
P09_Time1	DDR	0.4	503
P09_Time1	MAP	0.09	503
P09_Time2	NS	0.28	637
P09_Time2	CDR	0.18	637
P09_Time2	DDR	0.39	637
P09_Time2	MAP	0.15	637
P09_Time3	NS	0.3	659
P09_Time3	CDR	0.26	659
P09_Time3	DDR	0.23	659
P09_Time3	MAP	0.22	659
